# Supplementary material for: Effects of Genetic Background and Environmental Conditions on Texture Properties in a Recombinant Inbred Population of an Inter-Subspecies Cross
Source: Rice (N Y). 2019 May 9;12:32. doi: 10.1186/s12284-019-0286-x (PMC6509310; doi:10.1186/s12284-019-0286-x)
Supplement: Supplementary file 1 — Table S1. The sowing, heading and mature date of RILs in four areas. (XLSX 27 kb) [file 12284_2019_286_MOESM1_ESM.xlsx]

## Sheet: Sheet1
Additional file 1: Table S1. The sowing, heading and mature date of RILs in four areas.
Line	Area	Sowing date	Heading date	Mature date
1	GD	2019-07-20	2019-09-20 12:00:00	2019-11-04 12:00:00
2	GD	2019-07-20	2019-09-20	2019-11-04
3	GD	2019-07-20	2019-09-27	2019-11-11
4	GD	2019-07-20	2019-09-26	2019-11-10
5	GD	2019-07-20	2019-09-24 12:00:00	2019-11-08 12:00:00
6	GD	2019-07-20	2019-09-20 12:00:00	2019-11-04 12:00:00
7	GD	2019-07-20	2019-09-22	2019-11-06
8	GD	2019-07-20	2019-09-24 12:00:00	2019-11-08 12:00:00
9	GD	2019-07-20	2019-09-21	2019-11-05
10	GD	2019-07-20	2019-09-21	2019-11-05
11	GD	2019-07-20	2019-09-19 12:00:00	2019-11-03 12:00:00
12	GD	2019-07-20	2019-09-26	2019-11-10
13	GD	2019-07-20	2019-09-22	2019-11-06
14	GD	2019-07-20	2019-09-22	2019-11-06
15	GD	2019-07-20	2019-09-29	2019-11-13
16	GD	2019-07-20	2019-09-26 12:00:00	2019-11-10 12:00:00
17	GD	2019-07-20	2019-09-22	2019-11-06
18	GD	2019-07-20	2019-09-25 12:00:00	2019-11-09 12:00:00
19	GD	2019-07-20	2019-09-20	2019-11-04
20	GD	2019-07-20	2019-09-22	2019-11-06
21	GD	2019-07-20	2019-09-19	2019-11-03
22	GD	2019-07-20	2019-09-29	2019-11-13
23	GD	2019-07-20	2019-09-28 12:00:00	2019-11-12 12:00:00
24	GD	2019-07-20	2019-09-27	2019-11-11
25	GD	2019-07-20	2019-09-25 12:00:00	2019-11-09 12:00:00
26	GD	2019-07-20	2019-09-25	2019-11-09
27	GD	2019-07-20	2019-09-27	2019-11-11
28	GD	2019-07-20	2019-09-25 12:00:00	2019-11-09 12:00:00
29	GD	2019-07-20	2019-09-25	2019-11-09
30	GD	2019-07-20	2019-09-26	2019-11-10
31	GD	2019-07-20	2019-09-28	2019-11-12
32	GD	2019-07-20	2019-09-21	2019-11-05
33	GD	2019-07-20	2019-09-25 12:00:00	2019-11-09 12:00:00
34	GD	2019-07-20	2019-09-21 12:00:00	2019-11-05 12:00:00
35	GD	2019-07-20	2019-10-05	2019-11-19
36	GD	2019-07-20	2019-09-23	2019-11-07
37	GD	2019-07-20	2019-09-23 12:00:00	2019-11-07 12:00:00
38	GD	2019-07-20	2019-09-28 12:00:00	2019-11-12 12:00:00
39	GD	2019-07-20	2019-09-25	2019-11-09
40	GD	2019-07-20	2019-09-23 12:00:00	2019-11-07 12:00:00
41	GD	2019-07-20	2019-09-24 12:00:00	2019-11-08 12:00:00
42	GD	2019-07-20	2019-09-20 12:00:00	2019-11-04 12:00:00
43	GD	2019-07-20	2019-09-21 12:00:00	2019-11-05 12:00:00
44	GD	2019-07-20	2019-09-20 12:00:00	2019-11-04 12:00:00
45	GD	2019-07-20	2019-09-25 12:00:00	2019-11-09 12:00:00
46	GD	2019-07-20	2019-10-02 12:00:00	2019-11-16 12:00:00
47	GD	2019-07-20	2019-09-22 12:00:00	2019-11-06 12:00:00
48	GD	2019-07-20	2019-09-16 12:00:00	2019-10-31 12:00:00
49	GD	2019-07-20	2019-09-22	2019-11-06
50	GD	2019-07-20	2019-09-29	2019-11-13
51	GD	2019-07-20	2019-09-22 12:00:00	2019-11-06 12:00:00
52	GD	2019-07-20	2019-09-30	2019-11-14
53	GD	2019-07-20	2019-09-20 12:00:00	2019-11-04 12:00:00
54	GD	2019-07-20	2019-09-28 12:00:00	2019-11-12 12:00:00
55	GD	2019-07-20	2019-09-22	2019-11-06
56	GD	2019-07-20	2019-09-20 12:00:00	2019-11-04 12:00:00
57	GD	2019-07-20	2019-09-25	2019-11-09
58	GD	2019-07-20	2019-09-19 12:00:00	2019-11-03 12:00:00
59	GD	2019-07-20	2019-09-19	2019-11-03
60	GD	2019-07-20	2019-09-22 12:00:00	2019-11-06 12:00:00
61	GD	2019-07-20	2019-09-24	2019-11-08
62	GD	2019-07-20	2019-09-15	2019-10-30
63	GD	2019-07-20	2019-09-29 12:00:00	2019-11-13 12:00:00
64	GD	2019-07-20	2019-09-22	2019-11-06
65	GD	2019-07-20	2019-10-04 12:00:00	2019-11-18 12:00:00
66	GD	2019-07-20	2019-09-22 12:00:00	2019-11-06 12:00:00
67	GD	2019-07-20	2019-09-22 12:00:00	2019-11-06 12:00:00
68	GD	2019-07-20	2019-09-24	2019-11-08
69	GD	2019-07-20	2019-09-27	2019-11-11
70	GD	2019-07-20	2019-09-27 12:00:00	2019-11-11 12:00:00
71	GD	2019-07-20	2019-09-26	2019-11-10
72	GD	2019-07-20	2019-09-24	2019-11-08
73	GD	2019-07-20	2019-09-26	2019-11-10
74	GD	2019-07-20	2019-10-02	2019-11-16
75	GD	2019-07-20	2019-09-30 12:00:00	2019-11-14 12:00:00
76	GD	2019-07-20	2019-09-24 12:00:00	2019-11-08 12:00:00
77	GD	2019-07-20	2019-09-25 12:00:00	2019-11-09 12:00:00
78	GD	2019-07-20	2019-09-30 12:00:00	2019-11-14 12:00:00
79	GD	2019-07-20	2019-09-23 12:00:00	2019-11-07 12:00:00
80	GD	2019-07-20	2019-09-21 12:00:00	2019-11-05 12:00:00
81	GD	2019-07-20	2019-09-28	2019-11-12
82	GD	2019-07-20	2019-09-22 12:00:00	2019-11-06 12:00:00
83	GD	2019-07-20	2019-09-25 12:00:00	2019-11-09 12:00:00
84	GD	2019-07-20	2019-09-24 12:00:00	2019-11-08 12:00:00
85	GD	2019-07-20	2019-09-28	2019-11-12
86	GD	2019-07-20	2019-09-20 12:00:00	2019-11-04 12:00:00
87	GD	2019-07-20	2019-09-21	2019-11-05
88	GD	2019-07-20	2019-09-28	2019-11-12
89	GD	2019-07-20	2019-09-23 12:00:00	2019-11-07 12:00:00
90	GD	2019-07-20	2019-09-29	2019-11-13
91	GD	2019-07-20	2019-10-01 12:00:00	2019-11-15 12:00:00
92	GD	2019-07-20	2019-09-22 12:00:00	2019-11-06 12:00:00
93	GD	2019-07-20	2019-09-25	2019-11-09
94	GD	2019-07-20	2019-09-26 12:00:00	2019-11-10 12:00:00
95	GD	2019-07-20	2019-09-28	2019-11-12
96	GD	2019-07-20	2019-09-25 12:00:00	2019-11-09 12:00:00
97	GD	2019-07-20	2019-09-22 12:00:00	2019-11-06 12:00:00
98	GD	2019-07-20	2019-09-26 12:00:00	2019-11-10 12:00:00
99	GD	2019-07-20	2019-09-24	2019-11-08
100	GD	2019-07-20	2019-09-23 12:00:00	2019-11-07 12:00:00
101	GD	2019-07-20	2019-09-25	2019-11-09
102	GD	2019-07-20	2019-09-30	2019-11-14
103	GD	2019-07-20	2019-10-11	2019-11-25
104	GD	2019-07-20	2019-09-25 12:00:00	2019-11-09 12:00:00
105	GD	2019-07-20	2019-09-24	2019-11-08
106	GD	2019-07-20	2019-09-23 12:00:00	2019-11-07 12:00:00
107	GD	2019-07-20	2019-10-01	2019-11-15
108	GD	2019-07-20	2019-09-26 12:00:00	2019-11-10 12:00:00
109	GD	2019-07-20	2019-09-17 12:00:00	2019-11-01 12:00:00
110	GD	2019-07-20	2019-09-27	2019-11-11
111	GD	2019-07-20	2019-09-22	2019-11-06
112	GD	2019-07-20	2019-09-22 12:00:00	2019-11-06 12:00:00
113	GD	2019-07-20	2019-10-02 12:00:00	2019-11-16 12:00:00
114	GD	2019-07-20	2019-09-25	2019-11-09
115	GD	2019-07-20	2019-09-26 12:00:00	2019-11-10 12:00:00
116	GD	2019-07-20	2019-09-27	2019-11-11
117	GD	2019-07-20	2019-09-21 12:00:00	2019-11-05 12:00:00
118	GD	2019-07-20	2019-09-26	2019-11-10
119	GD	2019-07-20	2019-09-22 12:00:00	2019-11-06 12:00:00
120	GD	2019-07-20	2019-09-21 12:00:00	2019-11-05 12:00:00
121	GD	2019-07-20	2019-09-28 12:00:00	2019-11-12 12:00:00
122	GD	2019-07-20	2019-09-16	2019-10-31
123	GD	2019-07-20	2019-10-01	2019-11-15
124	GD	2019-07-20	2019-09-24	2019-11-08
125	GD	2019-07-20	2019-09-30	2019-11-14
126	GD	2019-07-20	2019-09-19	2019-11-03
127	GD	2019-07-20	2019-09-26 12:00:00	2019-11-10 12:00:00
128	GD	2019-07-20	2019-09-30	2019-11-14
129	GD	2019-07-20	2019-09-22	2019-11-06
130	GD	2019-07-20	2019-09-29 12:00:00	2019-11-13 12:00:00
131	GD	2019-07-20	2019-09-17 12:00:00	2019-11-01 12:00:00
132	GD	2019-07-20	2019-09-22	2019-11-06
133	GD	2019-07-20	2019-09-15 12:00:00	2019-10-30 12:00:00
134	GD	2019-07-20	2019-09-30 12:00:00	2019-11-14 12:00:00
135	GD	2019-07-20	2019-09-26 12:00:00	2019-11-10 12:00:00
136	GD	2019-07-20	2019-09-30 12:00:00	2019-11-14 12:00:00
137	GD	2019-07-20	2019-09-25	2019-11-09
138	GD	2019-07-20	2019-09-23	2019-11-07
139	GD	2019-07-20	2019-10-01	2019-11-15
140	GD	2019-07-20	2019-09-24 12:00:00	2019-11-08 12:00:00
141	GD	2019-07-20	2019-09-18 12:00:00	2019-11-02 12:00:00
142	GD	2019-07-20	2019-09-28	2019-11-12
143	GD	2019-07-20	2019-09-17	2019-11-01
144	GD	2019-07-20	2019-09-28	2019-11-12
145	GD	2019-07-20	2019-09-21 12:00:00	2019-11-05 12:00:00
146	GD	2019-07-20	2019-10-01	2019-11-15
147	GD	2019-07-20	2019-09-23	2019-11-07
148	GD	2019-07-20	2019-09-19 12:00:00	2019-11-03 12:00:00
149	GD	2019-07-20	2019-09-25 12:00:00	2019-11-09 12:00:00
150	GD	2019-07-20	2019-09-20 12:00:00	2019-11-04 12:00:00
151	GD	2019-07-20	2019-09-30	2019-11-14
1	SC	2019-04-12	2019-07-10	2019-08-24
2	SC	2019-04-12	2019-07-13	2019-08-27
3	SC	2019-04-12	2019-07-28	2019-09-11
4	SC	2019-04-12	2019-07-12 12:00:00	2019-08-26 12:00:00
5	SC	2019-04-12	2019-07-16	2019-08-30
6	SC	2019-04-12	2019-07-14 12:00:00	2019-08-28 12:00:00
7	SC	2019-04-12	2019-07-09 12:00:00	2019-08-23 12:00:00
8	SC	2019-04-12	2019-07-14	2019-08-28
9	SC	2019-04-12	2019-07-09	2019-08-23
10	SC	2019-04-12	2019-07-18 12:00:00	2019-09-01 12:00:00
11	SC	2019-04-12	2019-07-05 12:00:00	2019-08-19 12:00:00
12	SC	2019-04-12	2019-07-19 12:00:00	2019-09-02 12:00:00
13	SC	2019-04-12	2019-07-10	2019-08-24
14	SC	2019-04-12	2019-07-09 12:00:00	2019-08-23 12:00:00
15	SC	2019-04-12	2019-07-23 12:00:00	2019-09-06 12:00:00
16	SC	2019-04-12	2019-07-18	2019-09-01
17	SC	2019-04-12	2019-07-11 12:00:00	2019-08-25 12:00:00
18	SC	2019-04-12	2019-07-16	2019-08-30
19	SC	2019-04-12	2019-07-11 12:00:00	2019-08-25 12:00:00
20	SC	2019-04-12	2019-07-10 12:00:00	2019-08-24 12:00:00
21	SC	2019-04-12	2019-07-11	2019-08-25
22	SC	2019-04-12	2019-07-20 12:00:00	2019-09-03 12:00:00
23	SC	2019-04-12	2019-07-09	2019-08-23
24	SC	2019-04-12	2019-07-17 12:00:00	2019-08-31 12:00:00
25	SC	2019-04-12	2019-07-19 12:00:00	2019-09-02 12:00:00
26	SC	2019-04-12	2019-07-04 12:00:00	2019-08-18 12:00:00
27	SC	2019-04-12	2019-07-15 12:00:00	2019-08-29 12:00:00
28	SC	2019-04-12	2019-07-11 12:00:00	2019-08-25 12:00:00
29	SC	2019-04-12	2019-07-12 12:00:00	2019-08-26 12:00:00
30	SC	2019-04-12	2019-07-11 12:00:00	2019-08-25 12:00:00
31	SC	2019-04-12	2019-07-15	2019-08-29
32	SC	2019-04-12	2019-07-07 12:00:00	2019-08-21 12:00:00
33	SC	2019-04-12	2019-07-16 12:00:00	2019-08-30 12:00:00
34	SC	2019-04-12	2019-07-09	2019-08-23
35	SC	2019-04-12	2019-07-27	2019-09-10
36	SC	2019-04-12	2019-07-06 12:00:00	2019-08-20 12:00:00
37	SC	2019-04-12	2019-07-12 12:00:00	2019-08-26 12:00:00
38	SC	2019-04-12	2019-07-18	2019-09-01
39	SC	2019-04-12	2019-07-09 12:00:00	2019-08-23 12:00:00
40	SC	2019-04-12	2019-07-11	2019-08-25
41	SC	2019-04-12	2019-07-14	2019-08-28
42	SC	2019-04-12	2019-07-11 12:00:00	2019-08-25 12:00:00
43	SC	2019-04-12	2019-07-09	2019-08-23
44	SC	2019-04-12	2019-07-06	2019-08-20
45	SC	2019-04-12	2019-07-11	2019-08-25
46	SC	2019-04-12	2019-07-21	2019-09-04
47	SC	2019-04-12	2019-07-23 12:00:00	2019-09-06 12:00:00
48	SC	2019-04-12	2019-07-12	2019-08-26
49	SC	2019-04-12	2019-07-19	2019-09-02
50	SC	2019-04-12	2019-07-20	2019-09-03
51	SC	2019-04-12	2019-07-06	2019-08-20
52	SC	2019-04-12	2019-07-21 12:00:00	2019-09-04 12:00:00
53	SC	2019-04-12	2019-07-08	2019-08-22
54	SC	2019-04-12	2019-07-21 12:00:00	2019-09-04 12:00:00
55	SC	2019-04-12	2019-07-09 12:00:00	2019-08-23 12:00:00
56	SC	2019-04-12	2019-07-18 12:00:00	2019-09-01 12:00:00
57	SC	2019-04-12	2019-07-11 12:00:00	2019-08-25 12:00:00
58	SC	2019-04-12	2019-07-20	2019-09-03
59	SC	2019-04-12	2019-07-09	2019-08-23
60	SC	2019-04-12	2019-07-18 12:00:00	2019-09-01 12:00:00
61	SC	2019-04-12	2019-07-20	2019-09-03
62	SC	2019-04-12	2019-07-05 12:00:00	2019-08-19 12:00:00
63	SC	2019-04-12	2019-07-15 12:00:00	2019-08-29 12:00:00
64	SC	2019-04-12	2019-07-15 12:00:00	2019-08-29 12:00:00
65	SC	2019-04-12	2019-07-22	2019-09-05
66	SC	2019-04-12	2019-07-08	2019-08-22
67	SC	2019-04-12	2019-07-15	2019-08-29
68	SC	2019-04-12	2019-07-15 12:00:00	2019-08-29 12:00:00
69	SC	2019-04-12	2019-07-18 12:00:00	2019-09-01 12:00:00
70	SC	2019-04-12	2019-07-21	2019-09-04
71	SC	2019-04-12	2019-07-13 12:00:00	2019-08-27 12:00:00
72	SC	2019-04-12	2019-07-06	2019-08-20
73	SC	2019-04-12	2019-07-09 12:00:00	2019-08-23 12:00:00
74	SC	2019-04-12	2019-07-22 12:00:00	2019-09-05 12:00:00
75	SC	2019-04-12	2019-07-19	2019-09-02
76	SC	2019-04-12	2019-07-11	2019-08-25
77	SC	2019-04-12	2019-07-15	2019-08-29
78	SC	2019-04-12	2019-07-15 12:00:00	2019-08-29 12:00:00
79	SC	2019-04-12	2019-07-09	2019-08-23
80	SC	2019-04-12	2019-07-06 12:00:00	2019-08-20 12:00:00
81	SC	2019-04-12	2019-07-15 12:00:00	2019-08-29 12:00:00
82	SC	2019-04-12	2019-07-19 12:00:00	2019-09-02 12:00:00
83	SC	2019-04-12	2019-07-13	2019-08-27
84	SC	2019-04-12	2019-07-10 12:00:00	2019-08-24 12:00:00
85	SC	2019-04-12	2019-07-13 12:00:00	2019-08-27 12:00:00
86	SC	2019-04-12	2019-07-18 12:00:00	2019-09-01 12:00:00
87	SC	2019-04-12	2019-07-12 12:00:00	2019-08-26 12:00:00
88	SC	2019-04-12	2019-07-10 12:00:00	2019-08-24 12:00:00
89	SC	2019-04-12	2019-07-07 12:00:00	2019-08-21 12:00:00
90	SC	2019-04-12	2019-07-15	2019-08-29
91	SC	2019-04-12	2019-07-20 12:00:00	2019-09-03 12:00:00
92	SC	2019-04-12	2019-07-13 12:00:00	2019-08-27 12:00:00
93	SC	2019-04-12	2019-07-13	2019-08-27
94	SC	2019-04-12	2019-07-17 12:00:00	2019-08-31 12:00:00
95	SC	2019-04-12	2019-07-15	2019-08-29
96	SC	2019-04-12	2019-07-17	2019-08-31
97	SC	2019-04-12	2019-07-09 12:00:00	2019-08-23 12:00:00
98	SC	2019-04-12	2019-07-13	2019-08-27
99	SC	2019-04-12	2019-07-06 12:00:00	2019-08-20 12:00:00
100	SC	2019-04-12	2019-07-11	2019-08-25
101	SC	2019-04-12	2019-07-18 12:00:00	2019-09-01 12:00:00
102	SC	2019-04-12	2019-07-13 12:00:00	2019-08-27 12:00:00
103	SC	2019-04-12	2019-07-22	2019-09-05
104	SC	2019-04-12	2019-07-12	2019-08-26
105	SC	2019-04-12	2019-07-14 12:00:00	2019-08-28 12:00:00
106	SC	2019-04-12	2019-07-17	2019-08-31
107	SC	2019-04-12	2019-07-25 12:00:00	2019-09-08 12:00:00
108	SC	2019-04-12	2019-07-15	2019-08-29
109	SC	2019-04-12	2019-07-04 12:00:00	2019-08-18 12:00:00
110	SC	2019-04-12	2019-07-23	2019-09-06
111	SC	2019-04-12	2019-07-09	2019-08-23
112	SC	2019-04-12	2019-07-17	2019-08-31
113	SC	2019-04-12	2019-07-30 12:00:00	2019-09-13 12:00:00
114	SC	2019-04-12	2019-07-17 12:00:00	2019-08-31 12:00:00
115	SC	2019-04-12	2019-07-17 12:00:00	2019-08-31 12:00:00
116	SC	2019-04-12	2019-07-10 12:00:00	2019-08-24 12:00:00
117	SC	2019-04-12	2019-07-15	2019-08-29
118	SC	2019-04-12	2019-07-19 12:00:00	2019-09-02 12:00:00
119	SC	2019-04-12	2019-07-22	2019-09-05
120	SC	2019-04-12	2019-07-11	2019-08-25
121	SC	2019-04-12	2019-07-15	2019-08-29
122	SC	2019-04-12	2019-07-07	2019-08-21
123	SC	2019-04-12	2019-07-16	2019-08-30
124	SC	2019-04-12	2019-07-12	2019-08-26
125	SC	2019-04-12	2019-07-14 12:00:00	2019-08-28 12:00:00
126	SC	2019-04-12	2019-07-18 12:00:00	2019-09-01 12:00:00
127	SC	2019-04-12	2019-07-10	2019-08-24
128	SC	2019-04-12	2019-07-18	2019-09-01
129	SC	2019-04-12	2019-07-09 12:00:00	2019-08-23 12:00:00
130	SC	2019-04-12	2019-07-22 12:00:00	2019-09-05 12:00:00
131	SC	2019-04-12	2019-07-16	2019-08-30
132	SC	2019-04-12	2019-07-09 12:00:00	2019-08-23 12:00:00
133	SC	2019-04-12	2019-07-08	2019-08-22
134	SC	2019-04-12	2019-07-21	2019-09-04
135	SC	2019-04-12	2019-07-11 12:00:00	2019-08-25 12:00:00
136	SC	2019-04-12	2019-07-18 12:00:00	2019-09-01 12:00:00
137	SC	2019-04-12	2019-07-07	2019-08-21
138	SC	2019-04-12	2019-07-16 12:00:00	2019-08-30 12:00:00
139	SC	2019-04-12	2019-07-25	2019-09-08
140	SC	2019-04-12	2019-07-13 12:00:00	2019-08-27 12:00:00
141	SC	2019-04-12	2019-07-07	2019-08-21
142	SC	2019-04-12	2019-07-13	2019-08-27
143	SC	2019-04-12	2019-07-14	2019-08-28
144	SC	2019-04-12	2019-07-21 12:00:00	2019-09-04 12:00:00
145	SC	2019-04-12	2019-07-13	2019-08-27
146	SC	2019-04-12	2019-07-16 12:00:00	2019-08-30 12:00:00
147	SC	2019-04-12	2019-07-15	2019-08-29
148	SC	2019-04-12	2019-07-07	2019-08-21
149	SC	2019-04-12	2019-07-15 12:00:00	2019-08-29 12:00:00
150	SC	2019-04-12	2019-07-07 12:00:00	2019-08-21 12:00:00
151	SC	2019-04-12	2019-07-14 12:00:00	2019-08-28 12:00:00
1	LN	2019-04-15	2019-08-02	2019-09-16
2	LN	2019-04-15	2019-08-06	2019-09-20
3	LN	2019-04-15	2019-08-07	2019-09-21
4	LN	2019-04-15	2019-08-03	2019-09-17
5	LN	2019-04-15	2019-08-04	2019-09-18
6	LN	2019-04-15	2019-08-10	2019-09-24
7	LN	2019-04-15	2019-07-29	2019-09-12
8	LN	2019-04-15	2019-08-05	2019-09-19
9	LN	2019-04-15	2019-08-03	2019-09-17
10	LN	2019-04-15	2019-08-08	2019-09-22
11	LN	2019-04-15	2019-08-02	2019-09-16
12	LN	2019-04-15	2019-08-15	2019-09-29
13	LN	2019-04-15	2019-08-04	2019-09-18
14	LN	2019-04-15	2019-08-03	2019-09-17
15	LN	2019-04-15	2019-08-17	2019-10-01
16	LN	2019-04-15	2019-08-05	2019-09-19
17	LN	2019-04-15	2019-08-02	2019-09-16
18	LN	2019-04-15	2019-07-28	2019-09-11
19	LN	2019-04-15	2019-08-02	2019-09-16
20	LN	2019-04-15	2019-08-05	2019-09-19
21	LN	2019-04-15	2019-08-10	2019-09-24
22	LN	2019-04-15	2019-08-06	2019-09-20
23	LN	2019-04-15	2019-08-01	2019-09-15
24	LN	2019-04-15	2019-08-10	2019-09-24
25	LN	2019-04-15	2019-08-12	2019-09-26
26	LN	2019-04-15	2019-07-26	2019-09-09
27	LN	2019-04-15	2019-08-03	2019-09-17
28	LN	2019-04-15	2019-07-31	2019-09-14
29	LN	2019-04-15	2019-08-07	2019-09-21
30	LN	2019-04-15	2019-08-12	2019-09-26
31	LN	2019-04-15	2019-08-12	2019-09-26
32	LN	2019-04-15	2019-07-29	2019-09-12
33	LN	2019-04-15	2019-08-13	2019-09-27
34	LN	2019-04-15	2019-08-02	2019-09-16
35	LN	2019-04-15	2019-08-17	2019-10-01
36	LN	2019-04-15	2019-07-29	2019-09-12
37	LN	2019-04-15	2019-08-04	2019-09-18
38	LN	2019-04-15	2019-08-05	2019-09-19
39	LN	2019-04-15	2019-07-29	2019-09-12
40	LN	2019-04-15	2019-08-16	2019-09-30
41	LN	2019-04-15	2019-08-17	2019-10-01
42	LN	2019-04-15	2019-08-03	2019-09-17
43	LN	2019-04-15	2019-07-29	2019-09-12
44	LN	2019-04-15	2019-07-29	2019-09-12
45	LN	2019-04-15	2019-08-01	2019-09-15
46	LN	2019-04-15	2019-08-10	2019-09-24
47	LN	2019-04-15	2019-08-16	2019-09-30
48	LN	2019-04-15	2019-07-31	2019-09-14
49	LN	2019-04-15	2019-08-12	2019-09-26
50	LN	2019-04-15	2019-08-11	2019-09-25
51	LN	2019-04-15	2019-07-24	2019-09-07
52	LN	2019-04-15	2019-08-12	2019-09-26
53	LN	2019-04-15	2019-07-29	2019-09-12
54	LN	2019-04-15	2019-08-17	2019-10-01
55	LN	2019-04-15	2019-07-28	2019-09-11
56	LN	2019-04-15	2019-08-16	2019-09-30
57	LN	2019-04-15	2019-07-28	2019-09-11
58	LN	2019-04-15	2019-08-22	2019-10-06
59	LN	2019-04-15	2019-08-01	2019-09-15
60	LN	2019-04-15	2019-08-16	2019-09-30
61	LN	2019-04-15	2019-08-17	2019-10-01
62	LN	2019-04-15	2019-07-26	2019-09-09
63	LN	2019-04-15	2019-08-02	2019-09-16
64	LN	2019-04-15	2019-08-12	2019-09-26
65	LN	2019-04-15	2019-08-17	2019-10-01
66	LN	2019-04-15	2019-07-29	2019-09-12
67	LN	2019-04-15	2019-08-05	2019-09-19
68	LN	2019-04-15	2019-07-31	2019-09-14
69	LN	2019-04-15	2019-08-12	2019-09-26
70	LN	2019-04-15	2019-08-13	2019-09-27
71	LN	2019-04-15	2019-08-07	2019-09-21
72	LN	2019-04-15	2019-07-24	2019-09-07
73	LN	2019-04-15	2019-07-30	2019-09-13
74	LN	2019-04-15	2019-08-15	2019-09-29
75	LN	2019-04-15	2019-08-04	2019-09-18
76	LN	2019-04-15	2019-07-31	2019-09-14
77	LN	2019-04-15	2019-08-07	2019-09-21
78	LN	2019-04-15	2019-08-08	2019-09-22
79	LN	2019-04-15	2019-07-29	2019-09-12
80	LN	2019-04-15	2019-07-29	2019-09-12
81	LN	2019-04-15	2019-08-03	2019-09-17
82	LN	2019-04-15	2019-07-30	2019-09-13
83	LN	2019-04-15	2019-08-11	2019-09-25
84	LN	2019-04-15	2019-08-01	2019-09-15
85	LN	2019-04-15	2019-08-12	2019-09-26
86	LN	2019-04-15	2019-08-18	2019-10-02
87	LN	2019-04-15	2019-08-03	2019-09-17
88	LN	2019-04-15	2019-07-28	2019-09-11
89	LN	2019-04-15	2019-07-27	2019-09-10
90	LN	2019-04-15	2019-08-03	2019-09-17
91	LN	2019-04-15	2019-08-12	2019-09-26
92	LN	2019-04-15	2019-08-02	2019-09-16
93	LN	2019-04-15	2019-08-01	2019-09-15
94	LN	2019-04-15	2019-08-14	2019-09-28
95	LN	2019-04-15	2019-08-06	2019-09-20
96	LN	2019-04-15	2019-08-11	2019-09-25
97	LN	2019-04-15	2019-07-31	2019-09-14
98	LN	2019-04-15	2019-08-03	2019-09-17
99	LN	2019-04-15	2019-07-23	2019-09-06
100	LN	2019-04-15	2019-08-02	2019-09-16
101	LN	2019-04-15	2019-08-08	2019-09-22
102	LN	2019-04-15	2019-07-31	2019-09-14
103	LN	2019-04-15	2019-08-15	2019-09-29
104	LN	2019-04-15	2019-08-04	2019-09-18
105	LN	2019-04-15	2019-08-10	2019-09-24
106	LN	2019-04-15	2019-08-06	2019-09-20
107	LN	2019-04-15	2019-08-12	2019-09-26
108	LN	2019-04-15	2019-08-09	2019-09-23
109	LN	2019-04-15	2019-07-30	2019-09-13
110	LN	2019-04-15	2019-08-13	2019-09-27
111	LN	2019-04-15	2019-08-01	2019-09-15
112	LN	2019-04-15	2019-08-10	2019-09-24
113	LN	2019-04-15	2019-08-16	2019-09-30
114	LN	2019-04-15	2019-08-14	2019-09-28
115	LN	2019-04-15	2019-08-05	2019-09-19
116	LN	2019-04-15	2019-08-02	2019-09-16
117	LN	2019-04-15	2019-08-03	2019-09-17
118	LN	2019-04-15	2019-08-12	2019-09-26
119	LN	2019-04-15	2019-08-10	2019-09-24
120	LN	2019-04-15	2019-07-28	2019-09-11
121	LN	2019-04-15	2019-08-05	2019-09-19
122	LN	2019-04-15	2019-07-31	2019-09-14
123	LN	2019-04-15	2019-08-12	2019-09-26
124	LN	2019-04-15	2019-07-31	2019-09-14
125	LN	2019-04-15	2019-08-04	2019-09-18
126	LN	2019-04-15	2019-08-15	2019-09-29
127	LN	2019-04-15	2019-07-28	2019-09-11
128	LN	2019-04-15	2019-08-14	2019-09-28
129	LN	2019-04-15	2019-07-31	2019-09-14
130	LN	2019-04-15	2019-08-14	2019-09-28
131	LN	2019-04-15	2019-08-13	2019-09-27
132	LN	2019-04-15	2019-07-29	2019-09-12
133	LN	2019-04-15	2019-07-29	2019-09-12
134	LN	2019-04-15	2019-08-14	2019-09-28
135	LN	2019-04-15	2019-08-01	2019-09-15
136	LN	2019-04-15	2019-08-13	2019-09-27
137	LN	2019-04-15	2019-07-24	2019-09-07
138	LN	2019-04-15	2019-08-05	2019-09-19
139	LN	2019-04-15	2019-08-13	2019-09-27
140	LN	2019-04-15	2019-07-31	2019-09-14
141	LN	2019-04-15	2019-07-30	2019-09-13
142	LN	2019-04-15	2019-08-02	2019-09-16
143	LN	2019-04-15	2019-08-04	2019-09-18
144	LN	2019-04-15	2019-08-14	2019-09-28
145	LN	2019-04-15	2019-08-07	2019-09-21
146	LN	2019-04-15	2019-08-07	2019-09-21
147	LN	2019-04-15	2019-08-08	2019-09-22
148	LN	2019-04-15	2019-08-02	2019-09-16
149	LN	2019-04-15	2019-08-13	2019-09-27
150	LN	2019-04-15	2019-07-28	2019-09-11
151	LN	2019-04-15	2019-08-05	2019-09-19
1	JS	2019-05-08	2019-07-31	2019-09-14
2	JS	2019-05-08	2019-07-31	2019-09-14
3	JS	2019-05-08	2019-05-08	2019-06-22
4	JS	2019-05-08	2019-08-06 12:00:00	2019-09-20 12:00:00
5	JS	2019-05-08	2019-08-06	2019-09-20
6	JS	2019-05-08	2019-08-02	2019-09-16
7	JS	2019-05-08	2019-07-30 12:00:00	2019-09-13 12:00:00
8	JS	2019-05-08	2019-08-05	2019-09-19
9	JS	2019-05-08	2019-07-31	2019-09-14
10	JS	2019-05-08	2019-08-07	2019-09-21
11	JS	2019-05-08	2019-07-29	2019-09-12
12	JS	2019-05-08	2019-08-07	2019-09-21
13	JS	2019-05-08	2019-07-29	2019-09-12
14	JS	2019-05-08	2019-07-29 12:00:00	2019-09-12 12:00:00
15	JS	2019-05-08	2019-08-08	2019-09-22
16	JS	2019-05-08	2019-08-08	2019-09-22
17	JS	2019-05-08	2019-08-03	2019-09-17
18	JS	2019-05-08	2019-08-05	2019-09-19
19	JS	2019-05-08	2019-08-02 12:00:00	2019-09-16 12:00:00
20	JS	2019-05-08	2019-08-01	2019-09-15
21	JS	2019-05-08	2019-08-01	2019-09-15
22	JS	2019-05-08	2019-08-17 12:00:00	2019-10-01 12:00:00
23	JS	2019-05-08	2019-08-01	2019-09-15
24	JS	2019-05-08	2019-08-05 12:00:00	2019-09-19 12:00:00
25	JS	2019-05-08	2019-08-08	2019-09-22
26	JS	2019-05-08	2019-07-27 12:00:00	2019-09-10 12:00:00
27	JS	2019-05-08	2019-08-09	2019-09-23
28	JS	2019-05-08	2019-07-30	2019-09-13
29	JS	2019-05-08	2019-08-01 12:00:00	2019-09-15 12:00:00
30	JS	2019-05-08	2019-08-02 12:00:00	2019-09-16 12:00:00
31	JS	2019-05-08	2019-08-04	2019-09-18
32	JS	2019-05-08	2019-08-03	2019-09-17
33	JS	2019-05-08	2019-08-02	2019-09-16
34	JS	2019-05-08	2019-07-31	2019-09-14
35	JS	2019-05-08	2019-08-19	2019-10-03
36	JS	2019-05-08	2019-07-29	2019-09-12
37	JS	2019-05-08	2019-08-04	2019-09-18
38	JS	2019-05-08	2019-08-02 12:00:00	2019-09-16 12:00:00
39	JS	2019-05-08	2019-08-01	2019-09-15
40	JS	2019-05-08	2019-07-29 12:00:00	2019-09-12 12:00:00
41	JS	2019-05-08	2019-08-03 12:00:00	2019-09-17 12:00:00
42	JS	2019-05-08	2019-08-01 12:00:00	2019-09-15 12:00:00
43	JS	2019-05-08	2019-07-27 12:00:00	2019-09-10 12:00:00
44	JS	2019-05-08	2019-07-28 12:00:00	2019-09-11 12:00:00
45	JS	2019-05-08	2019-08-03 12:00:00	2019-09-17 12:00:00
46	JS	2019-05-08	2019-08-15	2019-09-29
47	JS	2019-05-08	2019-08-15 12:00:00	2019-09-29 12:00:00
48	JS	2019-05-08	2019-07-31 12:00:00	2019-09-14 12:00:00
49	JS	2019-05-08	2019-08-07	2019-09-21
50	JS	2019-05-08	2019-08-08	2019-09-22
51	JS	2019-05-08	2019-07-27 12:00:00	2019-09-10 12:00:00
52	JS	2019-05-08	2019-08-08	2019-09-22
53	JS	2019-05-08	2019-07-28 12:00:00	2019-09-11 12:00:00
54	JS	2019-05-08	2019-08-04	2019-09-18
55	JS	2019-05-08	2019-07-28	2019-09-11
56	JS	2019-05-08	2019-08-16	2019-09-30
57	JS	2019-05-08	2019-08-03	2019-09-17
58	JS	2019-05-08	2019-08-13	2019-09-27
59	JS	2019-05-08	2019-07-27	2019-09-10
60	JS	2019-05-08	2019-08-06	2019-09-20
61	JS	2019-05-08	2019-08-10	2019-09-24
62	JS	2019-05-08	2019-07-25	2019-09-08
63	JS	2019-05-08	2019-08-04 12:00:00	2019-09-18 12:00:00
64	JS	2019-05-08	2019-08-06	2019-09-20
65	JS	2019-05-08	2019-08-12	2019-09-26
66	JS	2019-05-08	2019-07-29 12:00:00	2019-09-12 12:00:00
67	JS	2019-05-08	2019-08-03	2019-09-17
68	JS	2019-05-08	2019-08-08	2019-09-22
69	JS	2019-05-08	2019-08-09	2019-09-23
70	JS	2019-05-08	2019-08-09	2019-09-23
71	JS	2019-05-08	2019-08-03	2019-09-17
72	JS	2019-05-08	2019-07-27 12:00:00	2019-09-10 12:00:00
73	JS	2019-05-08	2019-07-31 12:00:00	2019-09-14 12:00:00
74	JS	2019-05-08	2019-08-14	2019-09-28
75	JS	2019-05-08	2019-08-09	2019-09-23
76	JS	2019-05-08	2019-08-02	2019-09-16
77	JS	2019-05-08	2019-08-03	2019-09-17
78	JS	2019-05-08	2019-08-03	2019-09-17
79	JS	2019-05-08	2019-07-28	2019-09-11
80	JS	2019-05-08	2019-07-26	2019-09-09
81	JS	2019-05-08	2019-08-03	2019-09-17
82	JS	2019-05-08	2019-08-02	2019-09-16
83	JS	2019-05-08	2019-08-02	2019-09-16
84	JS	2019-05-08	2019-07-31	2019-09-14
85	JS	2019-05-08	2019-08-04 12:00:00	2019-09-18 12:00:00
86	JS	2019-05-08	2019-08-09	2019-09-23
87	JS	2019-05-08	2019-08-01	2019-09-15
88	JS	2019-05-08	2019-08-01	2019-09-15
89	JS	2019-05-08	2019-07-30	2019-09-13
90	JS	2019-05-08	2019-08-03	2019-09-17
91	JS	2019-05-08	2019-08-11	2019-09-25
92	JS	2019-05-08	2019-08-02 12:00:00	2019-09-16 12:00:00
93	JS	2019-05-08	2019-08-03	2019-09-17
94	JS	2019-05-08	2019-08-03 12:00:00	2019-09-17 12:00:00
95	JS	2019-05-08	2019-08-05	2019-09-19
96	JS	2019-05-08	2019-08-13 12:00:00	2019-09-27 12:00:00
97	JS	2019-05-08	2019-07-30	2019-09-13
98	JS	2019-05-08	2019-08-03	2019-09-17
99	JS	2019-05-08	2019-07-30	2019-09-13
100	JS	2019-05-08	2019-08-02	2019-09-16
101	JS	2019-05-08	2019-08-07	2019-09-21
102	JS	2019-05-08	2019-08-05	2019-09-19
103	JS	2019-05-08	2019-08-14 12:00:00	2019-09-28 12:00:00
104	JS	2019-05-08	2019-08-01	2019-09-15
105	JS	2019-05-08	2019-08-06	2019-09-20
106	JS	2019-05-08	2019-07-31	2019-09-14
107	JS	2019-05-08	2019-08-15	2019-09-29
108	JS	2019-05-08	2019-08-04	2019-09-18
109	JS	2019-05-08	2019-07-30 12:00:00	2019-09-13 12:00:00
110	JS	2019-05-08	2019-05-08	2019-06-22
111	JS	2019-05-08	2019-07-30 12:00:00	2019-09-13 12:00:00
112	JS	2019-05-08	2019-08-08	2019-09-22
113	JS	2019-05-08	2019-08-17 12:00:00	2019-10-01 12:00:00
114	JS	2019-05-08	2019-08-03 12:00:00	2019-09-17 12:00:00
115	JS	2019-05-08	2019-08-11 12:00:00	2019-09-25 12:00:00
116	JS	2019-05-08	2019-07-31	2019-09-14
117	JS	2019-05-08	2019-08-02 12:00:00	2019-09-16 12:00:00
118	JS	2019-05-08	2019-08-08	2019-09-22
119	JS	2019-05-08	2019-08-15	2019-09-29
120	JS	2019-05-08	2019-07-31	2019-09-14
121	JS	2019-05-08	2019-08-05 12:00:00	2019-09-19 12:00:00
122	JS	2019-05-08	2019-07-29	2019-09-12
123	JS	2019-05-08	2019-08-08 12:00:00	2019-09-22 12:00:00
124	JS	2019-05-08	2019-08-01	2019-09-15
125	JS	2019-05-08	2019-08-04	2019-09-18
126	JS	2019-05-08	2019-08-10 12:00:00	2019-09-24 12:00:00
127	JS	2019-05-08	2019-08-03 12:00:00	2019-09-17 12:00:00
128	JS	2019-05-08	2019-08-09	2019-09-23
129	JS	2019-05-08	2019-07-31 12:00:00	2019-09-14 12:00:00
130	JS	2019-05-08	2019-08-15	2019-09-29
131	JS	2019-05-08	2019-08-08	2019-09-22
132	JS	2019-05-08	2019-08-02	2019-09-16
133	JS	2019-05-08	2019-07-29 12:00:00	2019-09-12 12:00:00
134	JS	2019-05-08	2019-08-15	2019-09-29
135	JS	2019-05-08	2019-08-03 12:00:00	2019-09-17 12:00:00
136	JS	2019-05-08	2019-08-14 12:00:00	2019-09-28 12:00:00
137	JS	2019-05-08	2019-07-31	2019-09-14
138	JS	2019-05-08	2019-08-03 12:00:00	2019-09-17 12:00:00
139	JS	2019-05-08	2019-05-08	2019-06-22
140	JS	2019-05-08	2019-08-02	2019-09-16
141	JS	2019-05-08	2019-07-24	2019-09-07
142	JS	2019-05-08	2019-08-06	2019-09-20
143	JS	2019-05-08	2019-08-02	2019-09-16
144	JS	2019-05-08	2019-08-15	2019-09-29
145	JS	2019-05-08	2019-08-03	2019-09-17
146	JS	2019-05-08	2019-08-11	2019-09-25
147	JS	2019-05-08	2019-08-04	2019-09-18
148	JS	2019-05-08	2019-08-03	2019-09-17
149	JS	2019-05-08	2019-08-08	2019-09-22
150	JS	2019-05-08	2019-07-28	2019-09-11
151	JS	2019-05-08	2019-08-13	2019-09-27
